# Supplementary material
Source: Springer Nature journal article supplement (https://www.springerprofessional.de/resource/supplementary/13638_2011_541_MOESM5_ESM.pdf/11897734)

BEP Simulation for N=4 DF Distributed Beamforming with Lower & Upper Bounds

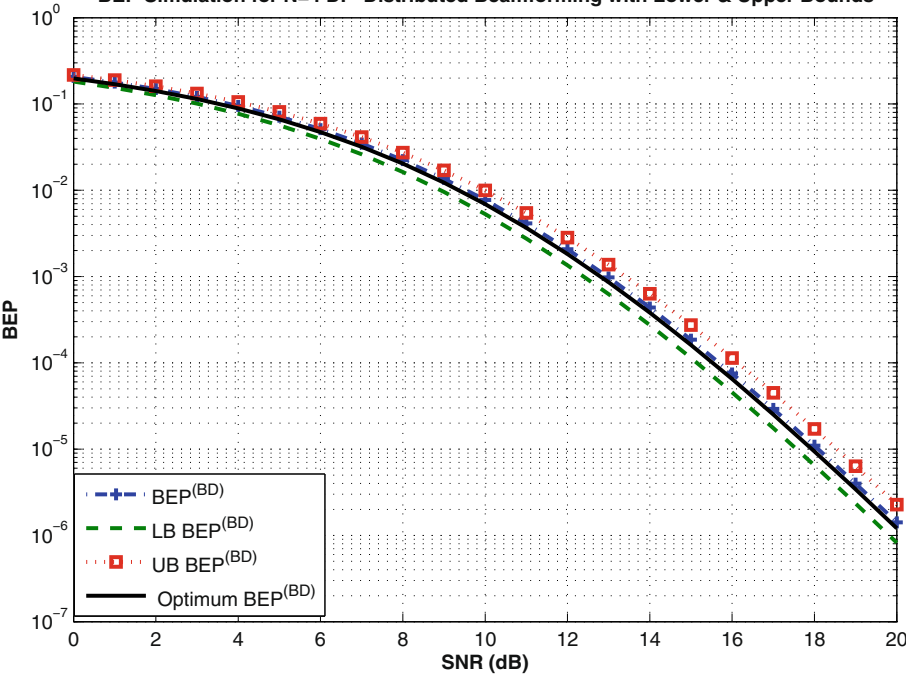

Supplement: MOESM5 [file 11897734]
